# Supplementary material for: Harmonizing heterogeneous transcriptomics datasets for machine learning-based analysis to identify spaceflown murine liver-specific changes
Source: Springer Nature journal article supplement (doi:10.1038/s41526-024-00379-3), 2024-06-11
Supplement: MOESM1 [file 41526_2024_379_MOESM1_ESM.pdf]

# Harmonizing Heterogeneous Transcriptomics Datasets for Machine Learning based Analysis to Identify Spaceflown Murine Liver-specific changes

Hari Ilangovan<sup>1\*</sup>, Prachi Kothiyal<sup>2</sup>, Katherine A. Hoadley<sup>3</sup>, Robin Elgart<sup>4</sup>, Greg Eley<sup>2</sup>, Parastou Eslami<sup>5</sup>

<sup>1</sup>Science Applications International Corporation (SAIC), Reston, VA 20190, USA

<sup>2</sup>Scimentis LLC, Statham, GA 30666, USA

<sup>3</sup> Department of Genetics, Computational Medicine Program, Lineberger Comprehensive Cancer Center, University of North Carolina at Chapel Hill, Chapel Hill, NC 27599, USA

<sup>4</sup>University of Houston, Houston, TX 77204, USA

<sup>5</sup>Universal Artificial Intelligence Inc, Boston, MA 02130, USA

\*ilangovan.hari@gmail.com

## Supplementary Figures

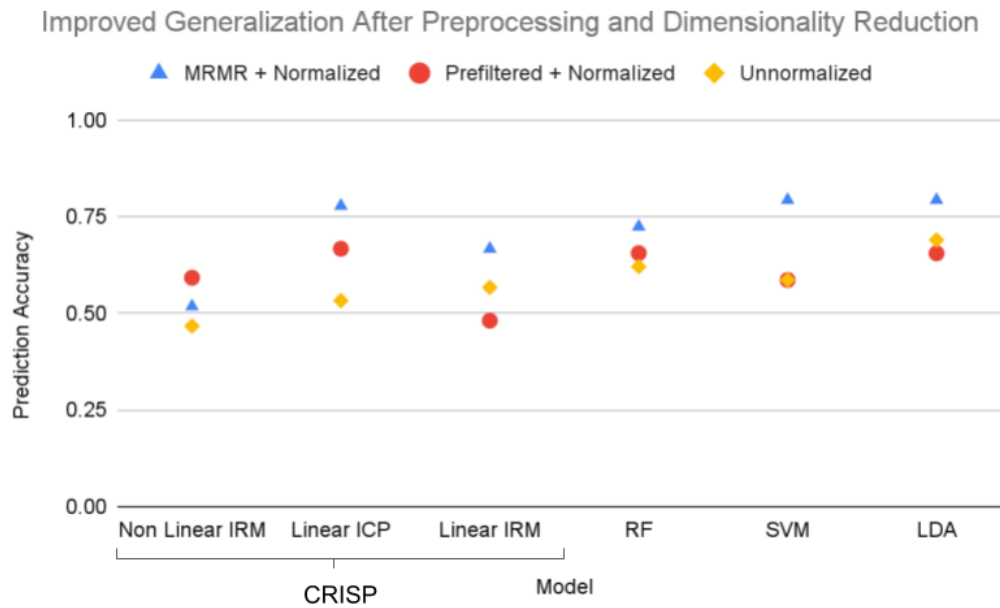

**Supplementary Figure 1: Improved performance using preprocessed data for SVM, RF, LDA and invariant methods from CRISP** The mRMR subset and standardized data show better performance on the testing set than unnormalized data across all methods. The mRMR and normalized dataset showed the best performance for RF, SVM, LDA, linear ICP, and linear IRM. IRM: invariant risk minimization; ICP: invariant causal prediction ; CRISP, causal reasoning and inference search platform; RF: random forest, SVM: support vector machine; LDA: linear discriminant analysis

## GO BP sets from Rodent Research Missions

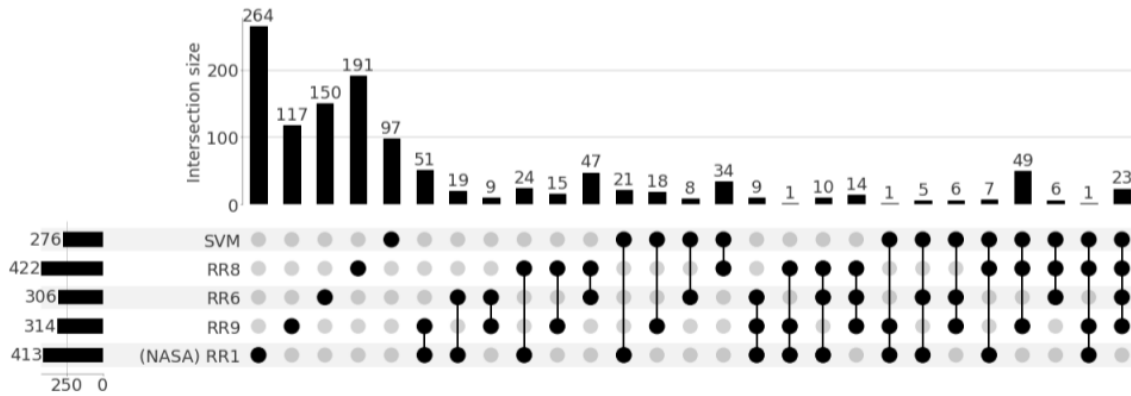

### Supplementary Fig. 2: Fold change-based ranking metric at single-study level and SVM-based ranking at merged-study level show strong overlapping GO BPs

Sets included in the UpSet plot shows the Gene Ontology biological processes returned from *DESeq2* analysis at an individual study level versus SVM analysis from the merged-study harmonized analysis. The rows indicate rodent mission titles for the study-level analysis and SVM for the combined study analysis. The columns indicate intersection sets that are based upon the filled-in dots.

RR, rodent research; SVM, support vector machine; GO gene ontology; BP biological process;

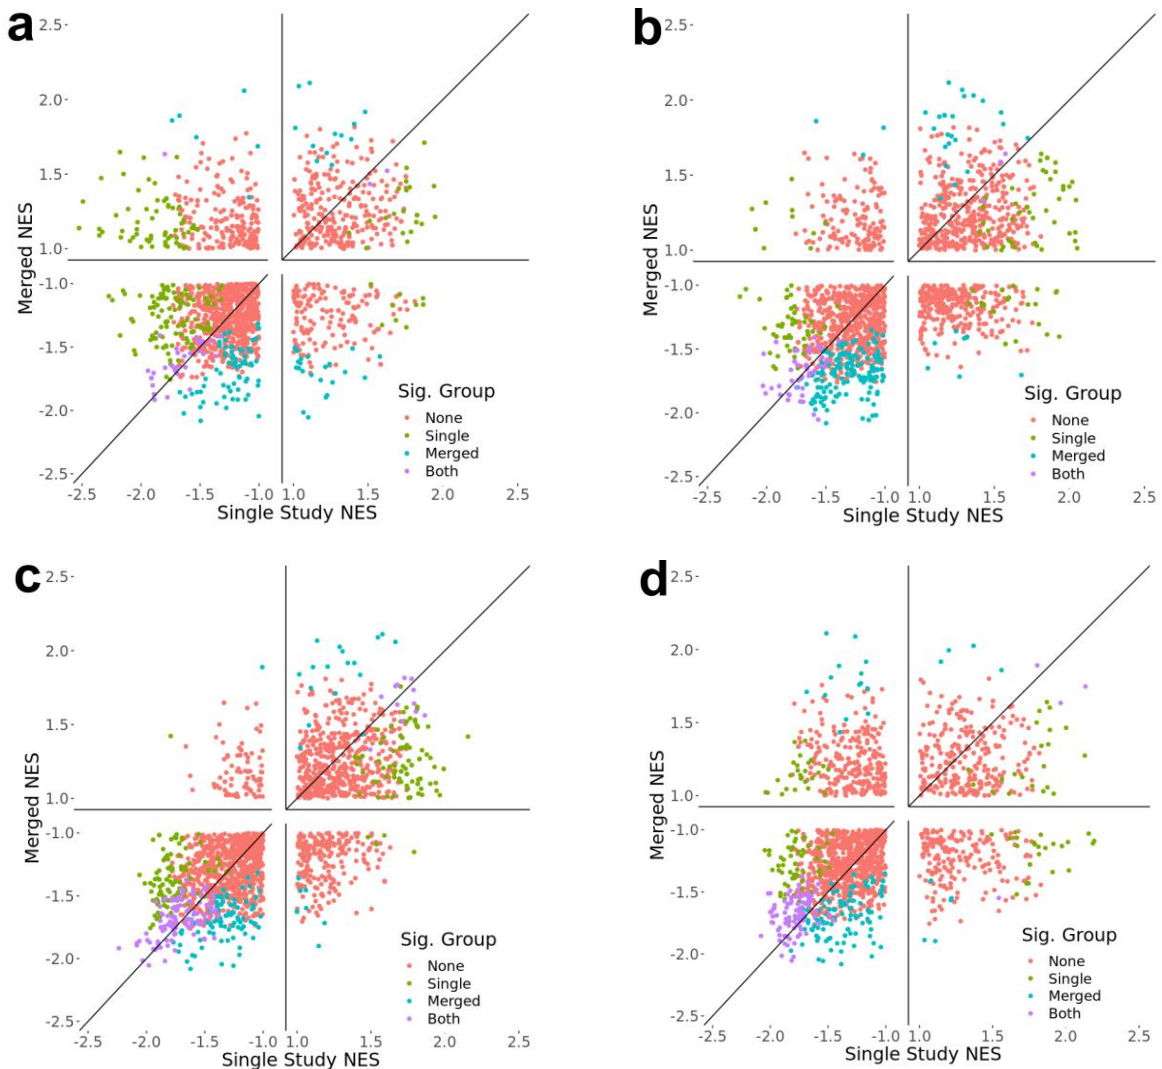

**Supplementary Fig. 3: Normalized enrichment score from GSEA compares between single mission analysis versus merged SVM analysis.**

**a:** The gene ontology biological processes (GO BPs) returned from GSEA for single-study analysis and the SVM merged study analysis with each point on the normalized enrichment score (NES) scatter plot representing a GO BP returned from both the single-study and SVM merged study analysis. Each GO BP is labeled based on its significance ( $p$ -value  $\leq 0.1$ ) in both single study and merged analysis, significance in the SVM merged analysis only, significance in the single study analysis only, and not significant ( $p$ -value  $> 0.1$ ) in either analysis for RR1 (NASA) **b:** RR6 **c:** RR8, **d:** RR9. NES, Normalized Enrichment Score; GO, Gene Ontology; BP, Biological Process; GSEA, Gene Set Enrichment Analysis; SVM, support vector machine

### Distribution of Gene-Sample Counts $\geq$ Min. Count Threshold (5)

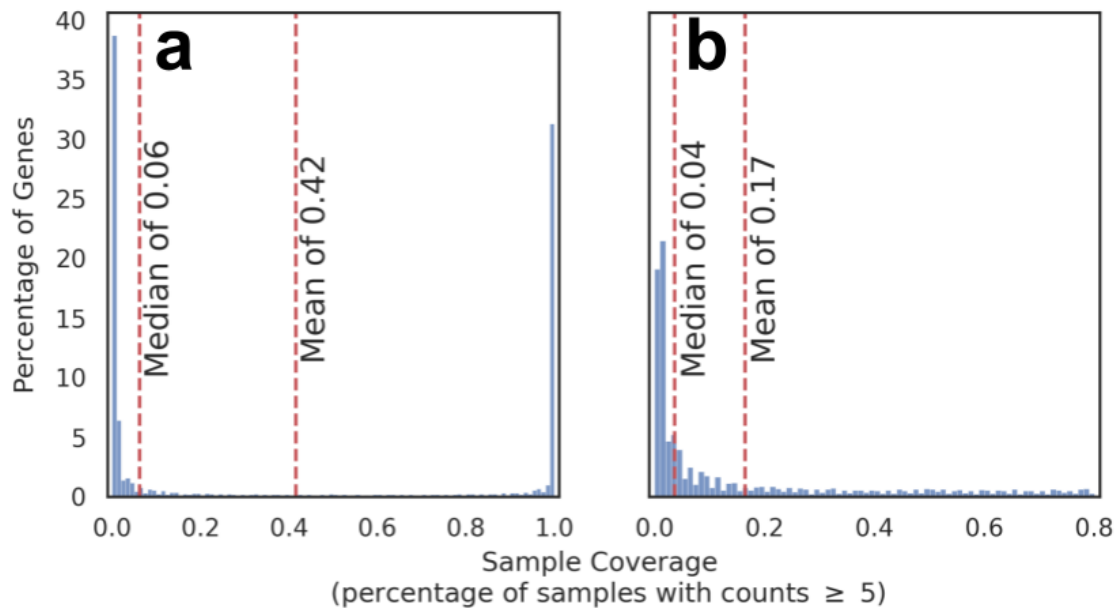

**Supplementary Fig. 4: Histogram of genes with counts exceeding the minimum count threshold across all samples** **a:** Histogram of the gene count measurements exceeding the minimum count threshold of 5 across all samples. The y-axis corresponds to the percentage of genes that belong to the percentile of sample coverage denoted by the x-axis (bin size = 1%). The observations corresponding to no coverage (sample coverage = 0%) and high coverage (sample coverage  $\geq$  80%) are referred to as tails. The distribution with tails and **b:** without tails are included with median and mean calculations overlaid. The median indicates sample coverage percentage associated with the 50th percentile of genes. The mean indicates the average sample coverage across all gene count measurements.

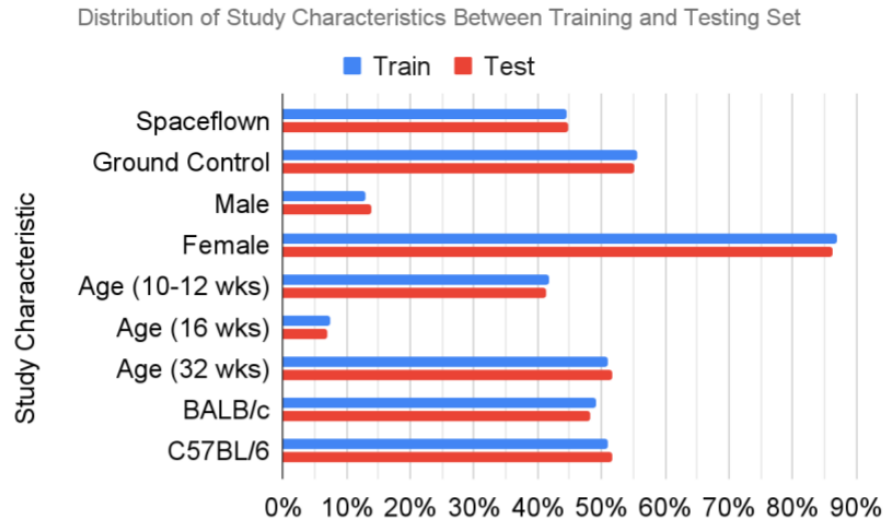

**Supplementary Fig. 5: The percent composition of study characteristics in the training and testing set for spaceflown status, sex, age, and strain.** The spaceflown status, sex, age at launch, and strain for NASA Rodent Research missions 1, 3, 6, 8, and 9 for n=13. An 80% training and 20% testing split is used to determine the relative composition between study characteristics, which are within 5% across each characteristic. The age refers to the age at launch in weeks.

## Supplementary Tables

**Supplementary Table 1: Feature counts at each dimensionality reduction step**

| Step | Description of Preprocessing                                | Number of Genes Remaining |
|------|-------------------------------------------------------------|---------------------------|
| 0    | None - Raw Original Data                                    | 55628                     |
| 1    | Overlap-only Subset (removing ERCC spike-in protocol genes) | 55536                     |
| 2    | Annotated pseudogenes filtering                             | 20101                     |
| 3    | Sample coverage filtered based on Low Count                 | 17772                     |
| 4    | Feature selection (mRMR) subsetting                         | 60                        |

**Supplementary Table 2: Top 60 features selected from Harmonized Dataset using mRMR**

| Gene               | Symbol        |
|--------------------|---------------|
| ENSMUSG00000058672 | Tubb2a        |
| ENSMUSG00000021556 | Golm1         |
| ENSMUSG00000112545 | 1300014J16Rik |
| ENSMUSG00000103864 | Gm37415       |
| ENSMUSG00000044068 | Zrsr1         |
| ENSMUSG00000033781 | Asb13         |
| ENSMUSG00000060509 | Xcr1          |
| ENSMUSG00000038393 | Txnip         |
| ENSMUSG00000049555 | Tmie          |
| ENSMUSG00000022324 | Matn2         |
| ENSMUSG00000026669 | Mcm10         |
| ENSMUSG00000033542 | Arhgef5       |
| ENSMUSG00000029287 | Tgfbr3        |
| ENSMUSG00000046962 | Zbtb21        |
| ENSMUSG00000050350 | Gpr18         |
| ENSMUSG00000026730 | Pter          |
| ENSMUSG00000066319 | Rtp3          |
| ENSMUSG00000019996 | Map7          |
| ENSMUSG00000042215 | Bag2          |
| ENSMUSG00000067787 | Blcap         |
| ENSMUSG00000034164 | Emid1         |
| ENSMUSG00000026179 | Pnkd          |
| ENSMUSG00000085715 | Tsix          |
| ENSMUSG00000056515 | Rab31         |
| ENSMUSG00000039067 | Psmc7         |
| ENSMUSG00000042406 | Atf4          |
| ENSMUSG00000027068 | Dhrs9         |
| ENSMUSG00000054843 | Atrnl1        |
| ENSMUSG00000030523 | Trpm1         |
| ENSMUSG00000050232 | Cxcr3         |
| ENSMUSG00000005547 | Cyp2a5        |
| ENSMUSG00000048521 | Cxcr6         |
| ENSMUSG00000037270 | 4932438A13Rik |
| ENSMUSG00000068011 | Mkrn2os       |
| ENSMUSG00000046916 | Myct1         |
| ENSMUSG00000027993 | Trim2         |
| ENSMUSG00000035266 | Helq          |

|                    |               |
|--------------------|---------------|
| ENSMUSG00000051969 | Tlr11         |
| ENSMUSG00000021918 | Nek4          |
| ENSMUSG00000036752 | Tubb4b        |
| ENSMUSG00000038884 | A230050P20Rik |
| ENSMUSG00000069920 | B3gnt9        |
| ENSMUSG00000027698 | Nceh1         |
| ENSMUSG00000059183 | Mtfmt         |
| ENSMUSG00000074890 | Lcmt2         |
| ENSMUSG00000042496 | Prdm10        |
| ENSMUSG00000041538 | H2-Ob         |
| ENSMUSG00000016520 | Lnx2          |
| ENSMUSG00000067049 | Unc93a        |
| ENSMUSG00000029413 | Naaa          |
| ENSMUSG00000041119 | Pde9a         |
| ENSMUSG00000020182 | Ddc           |
| ENSMUSG00000035493 | Tgfb1         |
| ENSMUSG00000086669 | AA645442      |
| ENSMUSG00000036078 | Sigmar1       |
| ENSMUSG00000032026 | Rexo2         |
| ENSMUSG00000027478 | Dnmt3b        |
| ENSMUSG00000001630 | Stk38l        |
| ENSMUSG00000030255 | Sspn          |
| ENSMUSG00000021557 | Agtpbp1       |

**Supplementary Table 3: Gene Ontology Biological Processes Identified from SVM Merged-Study Analysis**

| ID         | Description                                              |
|------------|----------------------------------------------------------|
| GO:0002526 | acute inflammatory response                              |
| GO:0006261 | DNA-dependent DNA replication                            |
| GO:0022408 | negative regulation of cell-cell adhesion                |
| GO:0007162 | negative regulation of cell adhesion                     |
| GO:0045342 | MHC class II biosynthetic process                        |
| GO:0003009 | skeletal muscle contraction                              |
| GO:0010951 | negative regulation of endopeptidase activity            |
| GO:0019884 | antigen processing and presentation of exogenous antigen |
| GO:0045346 | regulation of MHC class II biosynthetic process          |
| GO:0000727 | double-strand break repair via break-induced replication |
| GO:0031294 | lymphocyte costimulation                                 |
| GO:0009101 | glycoprotein biosynthetic process                        |
| GO:0098659 | inorganic cation import across plasma membrane           |
| GO:0099587 | inorganic ion import across plasma membrane              |
| GO:0006271 | DNA strand elongation involved in DNA replication        |
| GO:0007600 | sensory perception                                       |
| GO:0006268 | DNA unwinding involved in DNA replication                |
| GO:0032400 | melanosome localization                                  |
| GO:0048305 | immunoglobulin secretion                                 |
| GO:0023061 | signal release                                           |
| GO:0018200 | peptidyl-glutamic acid modification                      |
| GO:0007611 | learning or memory                                       |
| GO:0033619 | membrane protein proteolysis                             |
| GO:0051875 | pigment granule localization                             |
| GO:0002440 | production of molecular mediator of immune response      |
| GO:0050920 | regulation of chemotaxis                                 |
| GO:0031295 | T cell costimulation                                     |
| GO:0050879 | multicellular organismal movement                        |
| GO:0050881 | musculoskeletal movement                                 |
| GO:0018095 | protein polyglutamylation                                |
| GO:0099537 | trans-synaptic signaling                                 |
| GO:0006270 | DNA replication initiation                               |
| GO:0019233 | sensory perception of pain                               |
| GO:0052646 | alditol phosphate metabolic process                      |
| GO:0031649 | heat generation                                          |

|            |                                                               |
|------------|---------------------------------------------------------------|
| GO:0050663 | cytokine secretion                                            |
| GO:0002827 | positive regulation of T-helper 1 type immune response        |
| GO:2000514 | regulation of CD4-positive, alpha-beta T cell activation      |
| GO:0032946 | positive regulation of mononuclear cell proliferation         |
| GO:0042060 | wound healing                                                 |
| GO:0007268 | chemical synaptic transmission                                |
| GO:0098916 | anterograde trans-synaptic signaling                          |
| GO:0060055 | angiogenesis involved in wound healing                        |
| GO:0046640 | regulation of alpha-beta T cell proliferation                 |
| GO:0045620 | negative regulation of lymphocyte differentiation             |
| GO:0050890 | cognition                                                     |
| GO:0006022 | aminoglycan metabolic process                                 |
| GO:0045785 | positive regulation of cell adhesion                          |
| GO:1903510 | mucopolysaccharide metabolic process                          |
| GO:0050731 | positive regulation of peptidyl-tyrosine phosphorylation      |
| GO:0045214 | sarcomere organization                                        |
| GO:0002347 | response to tumor cell                                        |
| GO:0032633 | interleukin-4 production                                      |
| GO:0006023 | aminoglycan biosynthetic process                              |
| GO:0021694 | cerebellar Purkinje cell layer formation                      |
| GO:0007379 | segment specification                                         |
| GO:1901890 | positive regulation of cell junction assembly                 |
| GO:0030203 | glycosaminoglycan metabolic process                           |
| GO:0035592 | establishment of protein localization to extracellular region |
| GO:1901077 | regulation of relaxation of muscle                            |
| GO:0002286 | T cell activation involved in immune response                 |
| GO:0002418 | immune response to tumor cell                                 |
| GO:0032401 | establishment of melanosome localization                      |
| GO:0043370 | regulation of CD4-positive, alpha-beta T cell differentiation |
| GO:0006120 | mitochondrial electron transport, NADH to ubiquinone          |
| GO:0050921 | positive regulation of chemotaxis                             |
| GO:0060338 | regulation of type I interferon-mediated signaling pathway    |
| GO:0007613 | memory                                                        |
| GO:0045907 | positive regulation of vasoconstriction                       |
| GO:0043501 | skeletal muscle adaptation                                    |
| GO:0051905 | establishment of pigment granule localization                 |
| GO:0006638 | neutral lipid metabolic process                               |

|            |                                                                   |
|------------|-------------------------------------------------------------------|
| GO:0006639 | acylglycerol metabolic process                                    |
| GO:0008015 | blood circulation                                                 |
| GO:0001660 | fever generation                                                  |
| GO:0007601 | visual perception                                                 |
| GO:0032945 | negative regulation of mononuclear cell proliferation             |
| GO:2000516 | positive regulation of CD4-positive, alpha-beta T cell activation |
| GO:0009611 | response to wounding                                              |
| GO:0006953 | acute-phase response                                              |
| GO:0021692 | cerebellar Purkinje cell layer morphogenesis                      |
| GO:0071692 | protein localization to extracellular region                      |
| GO:0030239 | myofibril assembly                                                |
| GO:0032402 | melanosome transport                                              |
| GO:0055001 | muscle cell development                                           |
| GO:0002834 | regulation of response to tumor cell                              |
| GO:0002837 | regulation of immune response to tumor cell                       |
| GO:0002790 | peptide secretion                                                 |
| GO:0099054 | presynapse assembly                                               |
| GO:2000379 | positive regulation of reactive oxygen species metabolic process  |
| GO:0060009 | Sertoli cell development                                          |
| GO:0050707 | regulation of cytokine secretion                                  |
| GO:0043405 | regulation of MAP kinase activity                                 |
| GO:0099177 | regulation of trans-synaptic signaling                            |
| GO:0061383 | trabecula morphogenesis                                           |
| GO:0035994 | response to muscle stretch                                        |
| GO:0007610 | behavior                                                          |

**Supplementary Table 4: Top genes identified from the SVM merged-study gene set enrichment analysis**

| ENSEMBLID          | SYMBOL  |
|--------------------|---------|
| ENSMUSG00000027398 | Il1b    |
| ENSMUSG0000002603  | Tgfb1   |
| ENSMUSG00000035283 | Adrb1   |
| ENSMUSG00000049103 | Ccr2    |
| ENSMUSG00000045730 | Adrb2   |
| ENSMUSG00000020122 | Egfr    |
| ENSMUSG00000026981 | Il1rn   |
| ENSMUSG00000031132 | Cd40lg  |
| ENSMUSG00000022892 | App     |
| ENSMUSG00000026573 | Xcl1    |
| ENSMUSG00000031778 | Cx3cl1  |
| ENSMUSG00000020484 | Xbp1    |
| ENSMUSG00000037944 | Ccr7    |
| ENSMUSG00000027950 | Chrn2   |
| ENSMUSG00000004110 | Cacna1e |
| ENSMUSG00000024109 | Nrxn1   |
| ENSMUSG00000079037 | Prnp    |
| ENSMUSG00000019969 | Psen1   |
| ENSMUSG00000035042 | Ccl5    |
| ENSMUSG00000016496 | Cd274   |
| ENSMUSG00000062960 | Kdr     |
| ENSMUSG00000027239 | Mdk     |
| ENSMUSG00000020716 | Nf1     |
| ENSMUSG00000005952 | Trpv1   |
| ENSMUSG00000024597 | Slc12a2 |
| ENSMUSG00000024261 | Syt4    |
| ENSMUSG00000031012 | Cask    |
| ENSMUSG00000007655 | Cav1    |
| ENSMUSG00000061731 | Ext1    |
| ENSMUSG00000024610 | Cd74    |
| ENSMUSG00000004296 | Il12b   |
| ENSMUSG00000020399 | Havcr2  |
| ENSMUSG00000027859 | Ngf     |
| ENSMUSG00000027765 | P2ry1   |
| ENSMUSG00000026778 | Prkcq   |
| ENSMUSG00000031840 | Rab3a   |

|                    |        |
|--------------------|--------|
| ENSMUSG00000033860 | Fgg    |
| ENSMUSG00000079055 | Slc8a3 |
| ENSMUSG00000025888 | Casp1  |
| ENSMUSG00000034987 | Hrh2   |
| ENSMUSG00000033540 | Idua   |
| ENSMUSG00000018899 | Irf1   |
| ENSMUSG00000055254 | Ntrk2  |
| ENSMUSG00000020077 | Srgn   |
| ENSMUSG00000041135 | Ripk2  |
| ENSMUSG00000049313 | Sorl1  |
| ENSMUSG00000071005 | Ccl19  |

**Supplementary Table 5: Overlapping significant gene ontology (GO) biological processes (BP) from GSEA between single-study analysis of RR1 (NASA), RR6, RR8, RR9, and merged-study SVM analysis**

| GO ID      | Parent GO ID | Term Description                                                                                                          | Parent Term                               |
|------------|--------------|---------------------------------------------------------------------------------------------------------------------------|-------------------------------------------|
| GO:0002250 | GO:0002250   | adaptive immune response                                                                                                  | adaptive immune response                  |
| GO:0060326 | GO:0060326   | cell chemotaxis                                                                                                           | cell chemotaxis                           |
| GO:0006959 | GO:0002250   | humoral immune response                                                                                                   | adaptive immune response                  |
| GO:0032543 | GO:0032543   | mitochondrial translation                                                                                                 | mitochondrial translation                 |
| GO:0019882 | GO:0002250   | antigen processing and presentation                                                                                       | adaptive immune response                  |
| GO:0022409 | GO:0022409   | positive regulation of cell-cell adhesion                                                                                 | positive regulation of cell-cell adhesion |
| GO:0050870 | GO:0022409   | positive regulation of T cell activation                                                                                  | positive regulation of cell-cell adhesion |
| GO:0050900 | GO:0060326   | leukocyte migration                                                                                                       | cell chemotaxis                           |
| GO:0050778 | GO:0002250   | positive regulation of immune response                                                                                    | adaptive immune response                  |
| GO:0002821 | GO:0002250   | positive regulation of adaptive immune response                                                                           | adaptive immune response                  |
| GO:0002819 | GO:0002250   | regulation of adaptive immune response                                                                                    | adaptive immune response                  |
| GO:0002768 | GO:0002250   | immune response-regulating cell surface receptor signaling pathway                                                        | adaptive immune response                  |
| GO:1903039 | GO:0022409   | positive regulation of leukocyte cell-cell adhesion                                                                       | positive regulation of cell-cell adhesion |
| GO:0002253 | GO:0002250   | activation of immune response                                                                                             | adaptive immune response                  |
| GO:0002443 | GO:0002250   | leukocyte mediated immunity                                                                                               | adaptive immune response                  |
| GO:0002460 | GO:0002250   | adaptive immune response based on somatic recombination of immune receptors built from immunoglobulin superfamily domains | adaptive immune response                  |
| GO:0001906 | GO:0001906   | cell killing                                                                                                              | cell killing                              |
| GO:0002709 | GO:0002250   | regulation of T cell mediated immunity                                                                                    | adaptive immune response                  |

|            |            |                                                                                                                                                  |                                |
|------------|------------|--------------------------------------------------------------------------------------------------------------------------------------------------|--------------------------------|
| GO:0002822 | GO:0002250 | regulation of adaptive immune response based on somatic recombination of immune receptors built from immunoglobulin superfamily domains          | adaptive immune response       |
| GO:0002824 | GO:0002250 | positive regulation of adaptive immune response based on somatic recombination of immune receptors built from immunoglobulin superfamily domains | adaptive immune response       |
| GO:0031347 | GO:0031347 | regulation of defense response                                                                                                                   | regulation of defense response |
| GO:0032103 | GO:0031347 | positive regulation of response to external stimulus                                                                                             | regulation of defense response |
| GO:0002449 | GO:0002250 | lymphocyte mediated immunity                                                                                                                     | adaptive immune response       |
| GO:0031349 | GO:0031347 | positive regulation of defense response                                                                                                          | regulation of defense response |
